# Supplementary material for: ChimeraMiner: An Improved Chimeric Read Detection Pipeline and Its Application in Single Cell Sequencing
Source: PubMed Central journal article supplement (PMC6515389; doi:10.3390/ijms20081953), 2019-04-21
Supplement: ijms-20-01953-s001.pdf [file ijms-20-01953-s001.pdf]

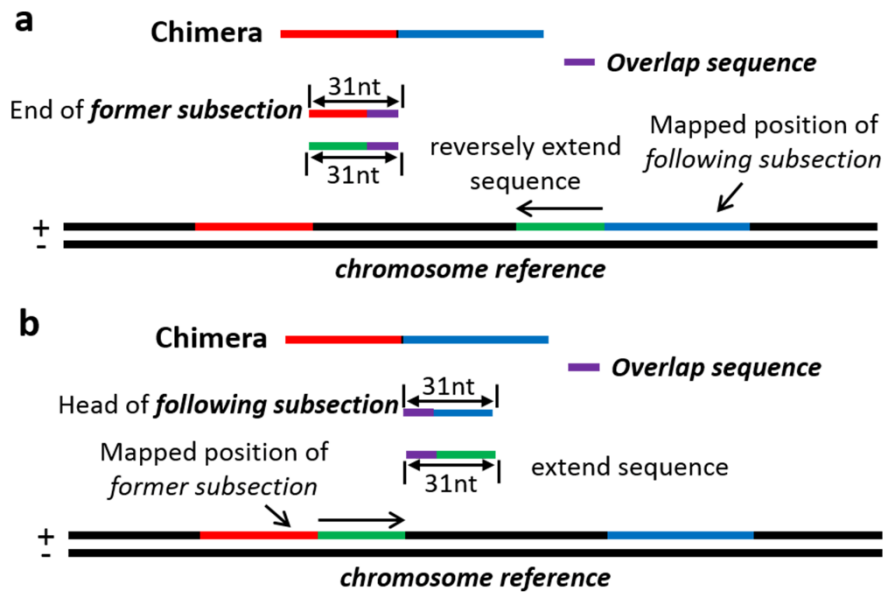

**Figure S2.** Demonstration of the searching overlap sequence. (a. The overlap sequence located at the end of the former subsection. b. The overlap sequence located at the head of the following subsection.) Firstly, we assumed that the overlap sequence located at the end of former subsection, and restricted the length of the overlap sequence with the maximum 30bp. To search the overlap sequence, the last 31-nt of the former subsection were cut. If the length of the former subsection was shorter than 31-nt, we polished the subsection with N forward. Then, based on the mapped position and orientation of the following subsections, we reversely extended the following subsection by 31-nt from the coordinate of its first base on reference genome. The last 31-nt of the former subsection was cyclically aligned with the extended 31-nt of the following subsections by shortening one nucleotide in one loop, till the overlap sequence was found or no sequence left. We tolerated one mismatch during the cyclically alignment, the mismatch cannot appear at the beginning of the overlap sequence (**a**). Hereafter, we assumed the overlap sequence located at the head of following subsection, so we cut the first 31-nt of the following subsection and extended the former subsection by 31-nt from the coordinates of its last base on reference genome. The cyclically alignment was repeated to achieve the overlap sequence (**b**).
